# Supplementary material
Source: publisher site journal article supplement (https://www.dovepress.com/article/308608)
Supplement: Supplementary file 1 [file get_supplementary_file.php]

**Supplement 1. BUMC Faculty Development Facilitator’s Guide Template**

| **Seminar Topic** |  |
| --- | --- |
| **Program** |  |
| **Date** |  |
| **Learning Objectives** |  |
| **Related Competencies** |  |
| **Reading/resources** |  |
| **Poem/cartoon quote/art/song*** |  |
| **Participant Preparation** |  |
| **Participant Commitment/**  **SMART Goal** |  |

**Directions for facilitator: please map out your session with the following table.** As per the example below, indicate the:

1. Topic for each section of the seminar
2. Content covered in each section
3. Activities/pedagogical tools utilized to facilitate learning of content – experiential or practice-based learning essential
4. Time allotted for each section
5. Build in time for participants to commit to a ***SMART*** (***S***pecific, ***M***easurable, ***A***chievable, ***R***elevant, and ***T***imed) behavior or activity to practice in follow-up

| **Topic** | **Content** | **Activity/Pedagogy** | **Time** |
| --- | --- | --- | --- |
| E.g.: How well do you plan your time? | E.g.: Review time management grid results as a group and discuss the following | E.g. Group discussion   1. What did you find surprising? 2. Were there discrepancies between how you want to spend your time and how you are actually spending your time? | E.g.: 4:00-4:10pm |
|  |  |  |  |
|  |  |  |  |
| **Commitment** | Commit to practicing one time management strategy between today and next session | Participants write down in their journal their commitment | 4:40-4:45 |
|  | Participants voice their commitment to group | 4:45-4:55 |
| **Evaluation** | Emphasize important to future sessions | Participants complete evaluation form | 4:55-5 |

| **Post-session Feed Forward** | |
| --- | --- |
| **Feedback** | **Modification** |
| Participant |  |
| Facilitators |  |

- Please note that the Facilitators’ guide is intended to increase the intentionality of faculty development session objectives, competencies, and learning. It is not intended as a straitjacket.
- The facilitator may realize in the course of the session that deviating from the topic, content, activity, and timelines better serves the participants’ needs and learning.

**Supplement 2. BUMC Women’s Leadership Program (WLP) Executive Summary**

**Overview:**

The WLP is a longitudinal program for women faculty in on the Boston University Medical Campus (BUMC). The program uses self-assessment and reflection, experiential learning, and peer and senior mentorship to provide faculty with the tools necessary to navigate a successful career in academic medicine, and to foster leadership skills that enable participants to positively affect change from where they stand.

**Learning Objectives:**

- Self-reflect and enhance awareness of strengths and areas for development
- Develop skills to effectively impact and lead change
- Achieve meaningful progress on a personal leadership goal
- Enhance peer mentoring and coaching skills

**Target Participants:**

BUMC women faculty members in leadership roles (e.g. Clinic Director, Associate Program Director, PI of a lab) are eligible to participate in the program.

**Time Commitment:**

Sessions are two hours long and take place from September to May approximately every three weeks, including experiential seminars, peer coaching, and conversation cafés.

**Program Components:**

- **Experiential seminars.** Senior faculty members and leaders from BUMC and beyond engage with participants around key determinants for effective leadership, with a special focus on topics identified as areas of particular interest to women faculty.
- **Peer coaching.** Participants develop peer mentoring and coaching skills to provide support and accountability to one another to successfully negotiate challenges, foster resiliency, and achieve personal goals.
- **Conversation café.** Opportunities to engage with inspirational women leaders from BU/BMC and beyond in an informal setting to learn about their career and leadership experiences, challenges, and insights.
- **Leadership goal.** Participants commit to making substantial progress on a personal leadership goal throughout the program.
- **Participant commitment.**Participants commit to actively participate in at least 12 of the 15 sessions, to make progress on their projects, and to engage in self-reflection and honest conversation with peer and senior mentors.

**Curriculum Topics:**

- Developmental Networks
- Peer Coaching I and II
- Time Management: Strategically Saying Yes and No to Achieve Your Career Goals
- Self-reflection, Awareness, and Assessment: Understanding Your Personality & Leadership Style
- Leading High Performing Teams
- Managing Conflict and Difficult Conversations
- Accountability
- Navigating Organizational Politics & Change
- Coach Each Other on a Difficult

Feedback Conversation You are Avoiding

- Art & Style of Interpersonal Communication as a Woman Leader
- Unconscious Bias
- Resiliency in Academic Health Sciences
- Envisioning and Creating Your Future

**Supplement 3. BUMC Under-Represented Groups (URG) Faculty Development Program Application**

1. Name
2. Email
3. Phone
4. Department/Section
5. Academic Rank
   - Instructor
   - Clinical Assistant Professor
   - Research Assistant Professor
   - Assistant Professor
   - Clinical Associate Professor
   - Research Associate Professor
   - Associate Professor
   - Professor
6. Track
7. Year joined BU
8. Do you consider yourself to be Hispanic/Latino?
   - Yes
   - No
9. In addition, select one or more of the following racial categories to describe yourself:
   - American Indian or Alaskan Native
   - Asian
   - Black or African American
   - Native Hawaiian or Pacific Islander
   - White
10. What is your gender?
    - Female
    - Male
    - Prefer to self-describe: _______
    - Prefer not to answer
11. Are you a first-generation college graduate? (optional)
12. What do you hope to gain from participating in this program?
13. What specific topics would be most helpful to have addressed in the program?
14. **Do you feel like you are receiving adequate mentoring? If not, please specify what kind of mentoring you are looking for (e.g., education, research, career, diversity, work/life integration). Please visit** <http://profiles.bu.edu/search/mentor> **to learn more about how to search for mentors.**
15. Program sessions will take place monthly on Thursday afternoons from 4:30-6pm from October through June. By clicking ‘yes’ below, you are committee to actively participating in at least 7 of the 9 sessions.
16. Please upload your current CV.
17. Please upload a letter of support from your Department Chair or Section Chief that indicates that he/she fully supports your participation.

**Supplement 4. BUMC Academy for Faculty Advancement (AFA) Early Career Pre-Program Needs Assessment Template**

1. Name (not necessary to disclose if you prefer not to include)
2. Why do you want to participate in the Academy for Faculty Advancement?
3. What are three concrete professional goals you are working toward?
4. What has been the most significant obstacle to your professional success?
5. What professional skills would you like to hone by participating in this program?
6. What questions about career development would you like to have answered during this program?
7. What strengths/skills do you have that you would be willing to peer mentor other participants in the program on? (E.g., grant writing, giving presentations, leading teams)

**Supplement 5. Academy for Faculty Advancement (AFA) Early Career Program Session Evaluation Template**

***Session Title****:*

***Session Facilitators****:*

***Date****:*

We are deeply appreciative of your feedback and suggestions to improve this program. Please answer all questions thoughtfully and honestly. Responses are used to adapt the program to better meet your needs.

1. How valuable was the content of today’s session for you overall?

(5 = excellent, 1 = poor, please circle one) 5 4 3 2 1

*Comments:*

1. How effective was the presenter?

(5 = excellent, 1 = poor, please circle one) 5 4 3 2 1

*Comments:*

1. How helpful was the discussion in learning communities?

(5 = excellent, 1 = poor, please circle one) 5 4 3 2 1

*Comments:*

1. How would you improve today’s session?
2. Please identify one take-away from today’s session that you can implement.

**Supplement 6. Academy for Faculty Advancement (AFA) Early Career Post-Program Evaluation Template**

*Dear Colleagues,*

*Please fill out this survey on the Academy for Faculty Advancement (AFA). Your feedback is very important to improve the AFA and help us plan future faculty development programs. Your responses are anonymous and will only be reported in aggregate form for planning and reporting purposes. Thank you!*

1. Primary Responsibilities (please select up to 2 responses)

- Clinical Practice
- Education
- Research
- Administrative
- Other: ________________________________________________

1. Please rate your agreement or disagreement with the following statements.

|  | Strongly Agree (1) | Agree (2) | Neither agree nor disagree (3) | Disagree (4) | Strongly Disagree (5) |
| --- | --- | --- | --- | --- | --- |
| The AFA was a valuable educational experience. |  |  |  |  |  |
| The AFA was well organized. |  |  |  |  |  |
| The program organizers/facilitators were available and approachable. |  |  |  |  |  |
| I have implemented the knowledge & skills gained in the AFA in my career. |  |  |  |  |  |
| I am better prepared to advance my career as a result of my participation in the AFA. |  |  |  |  |  |
| I have developed relationships with other AFA participants that have been beneficial to me. |  |  |  |  |  |
| I am better prepared to initiate and negotiate new mentoring relationships. |  |  |  |  |  |
| I have benefited from the relationship with my project mentor. |  |  |  |  |  |
| I have benefited from my relationship with my AFA career mentor. |  |  |  |  |  |
| I have benefited from the peer mentoring relationships in my learning community. |  |  |  |  |  |
| Having a senior faculty member/AFA facilitator in my learning community was valuable. |  |  |  |  |  |
| I would recommend the AFA to my colleagues. |  |  |  |  |  |

1. The total number of AFA sessions (14) was
   - Too few
   - Just right
   - Too many
2. The length of the AFA sessions (2.5 hours) was
   - Too short
   - Just right
   - Too long
3. Now that you have finished the AFA, what features were most valuable to you?
4. If you were to modify the AFA, what would you change? What aspects could be improved?
5. One of the goals of the AFA is to help participants build the skill sets to better navigate their careers (e.g. advancement and promotion, career success). In what ways do you think the AFA program succeeded in helping you navigate your career?
6. What else could the AFA program include to assist you in better navigating your career?
7. Another goal of the AFA is to instill the importance of mentoring relationships, and to discuss ways to make those relationships more productive. In what ways do you think the AFA program succeeded in helping you to develop and sustain mentoring relationships?
8. What else could the AFA program include to assist you in better developing and sustaining mentoring relationships?
9. Are there topics that should be added to the AFA curriculum?
10. Are there topics that should be dropped from the AFA curriculum?
11. Please share anything else about the AFA program you haven't already addressed.
